1  
2  
3  
4  
5  
6  
7  
8  
9  
10  
11  
12  
13  
14  
15  
16  
17  
18  
19  
20  
21  
22  
23  
24  
25  
26  
27

# Limited thermal plasticity and geographic divergence in the ovipositor of *Drosophila sukukii*

Ceferino Varón-González<sup>1</sup>, Antoine Fraimout<sup>2, 3</sup>, Arnaud Delapré<sup>1</sup>, Vincent Debat<sup>1</sup>, Raphaël Cornette<sup>1\*</sup>

<sup>1</sup>Institut de Systématique, Evolution, Biodiversité (ISYEB), Muséum National d’Histoire Naturelle, CNRS, Sorbonne Université, EPHE, Université des Antilles, 57 rue Cuvier, CP 50, 75005 Paris, France

<sup>2</sup>Centre de Biologie pour la Gestion des Populations, UMR CBGP, INRA, CIRAD, IRD, Montpellier SupAgro, University of Montpellier, 755 avenue du Campus Agropolis CS 30016, 34988 Montferrier sur Lez cedex, France.

<sup>3</sup> Current affiliation: Ecological Genetics Research Unit, Organismal and Evolutionary Biology Research Programme, Faculty of Biology and Environmental Sciences, Biocenter 3, Viikinkaari 1, FIN-0014, University of Helsinki, Finland.

\*Corresponding author:  
Raphaël Cornette, e-mail: [raphael.cornette@mnhn.fr](mailto:raphael.cornette@mnhn.fr)

## Running title:

Plasticity of *Drosophila sukukii* ovipositor to developmental temperature

## KEY WORDS:

*Drosophila sukukii*, ovipositor, plasticity, geometric morphometrics, development, invasion

28 **Summary statement:**

29 The ovipositor of different geographic populations of *Drosophila suzukii* showed a robust  
30 response against developmental temperature, suggesting a large spectrum in a wide range  
31 of environments.

32

33 **ABSTRACT**

34 Phenotypic plasticity has been repeatedly suggested to facilitate adaptation to new environmental  
35 conditions. In particular, it might be an important factor of biological invasions success. Here we  
36 investigate this possibility by focusing on the worldwide invasion of *Drosophila suzukii*. *D. suzukii* is  
37 an invasive species that has rapidly colonized all continents over the last decade. This species is  
38 characterized by a highly developed and sclerotized ovipositor, allowing females to lay eggs through  
39 the skin of ripe fruits. Using a novel approach based on the combined use of SEM and  
40 photogrammetry, we finely quantified the ovipositor size and 3D shape, contrasting invasive and  
41 native populations raised at three different developmental temperatures. We found a small but  
42 significant effect of temperature and geographic origin on the ovipositor shape, showing the  
43 occurrence of both geographic differentiation and plasticity to temperature. The shape reaction  
44 norms are in turn strikingly similar among populations, suggesting very little difference in shape  
45 plasticity among invasive and native populations, and therefore rejecting the hypothesis of a  
46 particular role for plasticity of the ovipositor in the invasion success. Overall, the ovipositor shape  
47 seems to be a fairly robust trait, indicative of stabilizing selection. The large performance spectrum  
48 rather than the flexibility of the ovipositor would thus contribute to the success of *D. suzukii*  
49 worldwide invasion.

50

51

52

53

54

55

56

## 57 INTRODUCTION

58 Phenotypic plasticity is a pervasive feature in nature (West-Eberhard, 1989) and a major response to  
59 changing environmental conditions (Bradshaw, 1965). Because it may facilitate the colonization of  
60 new environments (e. g. Lande, 2015), it has been suggested that plasticity may play an important  
61 role in biological invasions: accordingly, invasive populations are expected to be more plastic than  
62 non invasive populations (Davidson et al., 2011; Lande, 2015; Lee and Gelembiuk, 2008; Richards et  
63 al., 2006; Yeh and Price, 2004). Although often discussed theoretically (Chevin et al., 2010; Via and  
64 Lande, 1985), this hypothesis has been comparatively rarely tested (Richards et al., 2006), in  
65 particular in animal species (Fraitout et al., 2018; Loh et al., 2008).

66 *Drosophila suzukii* has received much attention over the last 10 years, as it has colonized  
67 multiple countries worldwide (Fraitout et al., 2017) and induced severe losses in agriculture (Asplen  
68 et al., 2015; Farnsworth et al., 2017; Mazzi et al., 2017). This species has been extensively collected  
69 to test hypotheses about the role of plasticity during its invasion (e.g. Clemente et al., 2018; Fraitout  
70 et al., 2018; Poyet et al., 2015; Shearer et al., 2016). However, plasticity largely depends on the  
71 environmental factor considered and the morphological trait under study (Fraitout et al., 2018;  
72 Nijhout and German, 2012; Nijhout et al., 2014; Shingleton et al., 2009). For *D. suzukii*, temperature  
73 has been frequently chosen as the factor inducing phenotypic plasticity due to its pervasive effect on  
74 insect development (e. g. Atkinson, 1994; Crill et al., 1996; David et al., 1997) and its importance in  
75 shaping the distribution of *Drosophila* species (David et al., 1997). Different morphological structures  
76 such as wings, thorax and ovipositor have been investigated (e. g. Clemente et al., 2018; Fraitout et  
77 al., 2018; Shearer et al., 2016). The ovipositor is a particularly interesting structure owing to the  
78 reproductive behavior of this species: *D. suzukii*'s damaging potential is indeed due to its over-  
79 developed ovipositor, used to pierce through the skin of ripening fruits and lay its eggs (Atallah et al.,  
80 2014). It is well-known that fruits texture is strongly affected by temperature (e. g. Bourne, 1982):  
81 specifically, their firmness and resistance to puncture tends to decrease with increasing temperature  
82 (e. g. Khazaei and Mann, 2004). It is thus conceivable that *D. suzukii* ovipositor might present some  
83 adaptive plasticity to temperature, allowing it to pierce fruits skins of (thermally induced) varying  
84 resistance. An alternative hypothesis is that it might rather be under stabilizing selection, as has been  
85 suggested in *D. melanogaster* for genitalia (Shingleton et al., 2009), in which case we should expect a  
86 reduced sensitivity to temperature.

87 The ovipositor is a microscopic 3D structure (about 500  $\mu\text{m}$ ). 3D characterization of its shape  
88 is essential to recover all the possible features involved in its performance and therefore to link its  
89 morphology to the possible selective forces affecting it. 2D approximations of 3D structures might be  
90 troublesome because all the variation recovered by one physical dimension would be missing and

91 that might affect the analysis (Buser et al., 2018; Cardini, 2014). Finally, the complete description of  
92 shape may be particularly important for assessing the ovipositor plasticity: a 2D analysis could lead to  
93 underestimations of the plastic shape change when the plastic variation is not recovered among the  
94 shape descriptors. We thus developed an approach based on the combination of Scanning Electron  
95 Microscopy (SEM)-based photogrammetry and 3D geometric morphometrics allowing to finely depict  
96 and quantify the ovipositor 3D shape and its variation.

97 In this study we analyze the plastic response of the ovipositor shape to developmental  
98 temperature in three different geographic populations of *D. sukukii*, including a population from the  
99 native range (Japan) and two populations from the invaded range (France and USA). By contrasting  
100 laboratory lines derived from native and invasive populations, we (1) investigate whether there is any  
101 genetic divergence in the ovipositor shape across the distribution range; (2) quantify the ovipositor  
102 plasticity to temperature and (3) investigate whether plasticity is higher in invasive populations, as  
103 predicted if plasticity played a role in the invasion success, possibly allowing *D. sukukii* to exploit a  
104 larger diversity of substrates in varying thermal conditions.

105

## 106 **MATERIALS AND METHODS**

### 107 **Samples**

108 Adult flies were sampled in 2014 using banana bait traps and net swiping in three different regions:  
109 one belonging to the native range (Sapporo, Hokkaido, Japan) and two to the invasive range (Paris,  
110 France and Dayton, Oregon, USA). Ten isofemale lines per locality were stocked so that they  
111 performed single matings separately and the F1 offspring was expanded in consecutive series of vials  
112 (Hoffmann and Parsons, 1988). These stocks were maintained at 22°C on a medium with corn starch,  
113 yeast with antibiotics and hydroxyl-4 benzoate. Female flies were left to oviposit for 24 hours in two  
114 separate sets of 20 vials and after oviposition was checked parent flies were removed. Then, two  
115 batches were placed in two incubators: one set of eggs was stored at 16°C and other one at 28°C  
116 (keeping a third at 22°C). Therefore, for each population and temperature we produced ten  
117 isofemale lines in separate rearing vials with single matings at three different experimental  
118 temperatures: i.e. 30 lines per geographic population. The position of the incubators was assigned  
119 randomly and they were kept at the experimental temperatures until 2 days after the emergence.

120 Final samples consisted on 20 individuals from Paris raised at 16°C, 11 at 22°C and 13 at 28°C.  
121 19 individuals from Sapporo raised at 16°C, 20 at 22°C and 23 at 28°C and 14 individuals from Dayton  
122 at 16°C, 6 at 22°C and 13 at 28°C.

## 123 **Electronic microscopy**

124 For each fly, the ovipositor was detached from the body – the two valves being kept in connection –  
125 and the connective tissues were manually removed. Because all the specimens were conserved in  
126 alcohol, no deformation was produced during the removal of the ovipositors. Then, they were  
127 photographed using an environmental scanning electron microscope (ESEM). Images were collected  
128 in low vacuum (0.37 Torr) with a large field low vacuum SED detector (LFD) using a FEI Quanta 200  
129 FEG operating at 15 Kv at a working distance of 10 mm.

130 From each ovipositor 52 pictures were taken describing two semicircular trajectories,  
131 perpendicular between them. That allowed recovering information from all different angles of each  
132 specimen.

## 133 **Photogrammetric reconstruction**

134 The 3D reconstruction of each ovipositor was inferred using photogrammetry (Figure 1), the  
135 technique allowing the 3D representation of an object from a set of pictures. The photogrammetric  
136 process starts with the alignment of the pictures obtained from the ESEM, i. e. the recognition of  
137 analogous parts among pictures. Where difficulties for the picture alignment were found, a mask was  
138 applied to select just the ovipositor within the pictures and discard the background, facilitating the  
139 correct alignment of the pictures. The inference of the distances among analogous pixels allow the  
140 inference of the position of these pixels in a 3D space (i. e. the transformation of pixels in voxels).  
141 Once this first point cloud was inferred, all the voxels not corresponding to the ovipositor itself were  
142 removed. This cleaning fastens the next step, the reexamination of the picture alignment once a first  
143 point cloud was build in order to obtain more analogous voxels. As a result, from the first point cloud  
144 we obtained a dense cloud. Finally, a mesh was built based on the dense cloud with no *a priori* about  
145 the final shape (arbitrary surface type). All reconstructions were done in PhotoScan (Agisoft, 2014).

146 Because many of the reconstructions were built using a mask, the scale bar present in the  
147 pictures did not appear in the 3D reconstructions and therefore we could not give the correct scale of  
148 each 3D model during the reconstruction process. For that, once the 3D models were obtained we  
149 measured the real lengths of the ovipositors in the pictures using ImageJ 1.51j8 (Rasband, 2012) and  
150 then we scale each ovipositor in MeshLab v2016.12 (Cignoni et al., 2008). The advantage of MeshLab  
151 is that the linear measurements of the object do not consider its surface curvature (i.e. it uses  
152 Euclidean distances), the same as picture measurements. In any case, to avoid any possible  
153 deformation due to the picture perspective we used the dorsal pictures of the ovipositor and the  
154 dorsal 3D view of the ovipositor (the flattest part).

## 155 **Morphometric analyses**

156 A set of 5 landmarks and three curves containing in total 130 semi-landmarks were defined in each  
157 3D mesh (Figure 1) (Gunz and Mitteroecker, 2013). One pair of landmarks was fixed at the most distal  
158 part of the ovipositor and other pair at the most proximal part. The fifth fixed landmark was placed  
159 on the dorsal area, at the ovipositor opening. Two curves with 60 semilandmarks each were placed  
160 on the ovipositor sides. The other 10 semilandmarks surround the proximal area of the ovipositor.  
161 Landmarking was performed on Landmark Software (Wiley et al., 2005). Then, we created a template  
162 replicating a simplified form of an ovipositor (Figure 1), composed of 394 surface points. Landmarks,  
163 semilandmarks and 394 surface semilandmarks were digitized on the template and they were used  
164 to deform the template via thin plate spline. Finally, all landmarks were projected on the ovipositor  
165 and they slid to minimize bending energy taking into account the ovipositor object symmetry  
166 (Gunz et al., 2005). In total 529 landmarks described the ovipositor shape for each individual. This  
167 process follows the protocol described by Botton-Divet et al. (2015). The template was created with  
168 Meshlab (Cignoni et al., 2008) and the position of these landmarks and the subsequent sliding were  
169 performed with the R package Morpho (Schlager, 2017).

170 To assess the quality of the 3D shape reconstruction we replicated the reconstruction  
171 process five times on two individuals from the same geographic population and raised at the same  
172 temperature (two Sapporo individuals raised at 16°), so the variance between individuals was  
173 minimized as much as possible. The reconstructions was done on each one of these two individuals  
174 five times and the landmarks were collected on each of the ten meshes. A multivariate model was  
175 run with the function *procD.lm* (Adams et al., 2018) to test for the amount of variance explained by  
176 inter-individual variation in relation to the variation explained by the reconstruction and landmarking  
177 processes (residuals).

178 Differences among populations and temperatures were explored using a between-group PCA  
179 (Mitteroecker and Bookstein, 2011) and the effect on shape of the temperature and population  
180 factors as well as their interaction were tested with a linear multivariate model and permutation  
181 tests as performed in the geomorph function *procD.lm* (Adams et al., 2018). The effect size for each  
182 factor was assessed by  $Z$ , an estimator based on the F-statistic (Collyer et al., 2015). The effect the  
183 two factors on the centroid size was assessed with a two-way ANOVA.

184 To further compare the plastic responses among populations we used the trajectory analysis  
185 method developed by Collyer and Adams (2013). This approach specifically tests the similarity  
186 between trajectories depicting shape changes in the multivariate shape space and it can be readily  
187 transposed to the analysis of shape reaction norms. With this analysis, three different aspects of the

188 shape change are studied: the amount of shape change as the trajectory path length (size), the  
189 pattern of shape covariation as the difference in angles among the first principal component of each  
190 trajectory (direction) and the differences in trajectory shapes (shape) as Procrustes distances  
191 between pairs of phenotypic trajectories.

192 Allometry was quantified using a linear model of the logarithm of the centroid size against  
193 symmetric shape (Monteiro, 1999). A general allometric pattern was expected given the pervasive  
194 effect of temperature on size in insects (David et al., 1997) as well as previously published effects in  
195 2D (Clemente et al., 2018). Differences in the allometric slopes among geographic populations were  
196 also assessed. Because the allometric patterns are expected to be primarily influenced by  
197 temperature variation, we would expect the differences in allometric slopes and the differences in  
198 reaction norms to be analogous. All morphometric tests were applied in the R package geomorph  
199 (Adams et al., 2018).

200 Finally, we investigated the degree of relative robustness of the ovipositor, by comparing its  
201 variation with that of the wing, as assessed on the same samples by Fraimout et al. (2018). For size,  
202 we simply computed the coefficient of variation both within and among temperatures (i. e. among  
203 mean centroid sizes per temperature), for both structures. Comparing the shape variability of two  
204 different objects is challenging, because they lie in different shape spaces and no direct multivariate  
205 extension of the coefficient of variation can be applied. We used Mahalanobis distances among  
206 temperatures, computed independently for the two structures, as a measure of their relative  
207 sensitivity to temperature. Because this distance measures the difference between groups relative to  
208 the within group variation (Klingenberg and Monteiro, 2005), it should be comparable between  
209 structures. As distance measures are affected by the data dimensionality, we estimated the  
210 Mahalanobis distances on the same number of principal components for each dataset (26 principal  
211 components: 100% of the fly shape variation and 96.94% of the ovipositor shape variation). To obtain  
212 the distances among temperatures we applied the function CVA in the R package Morpho (Schlager,  
213 2017). All analyses and data management were conducted in RStudio version 1.1.442 (RStudio Team,  
214 2016).

215

## 216 **RESULTS**

217 The 3D shape reconstruction of the ovipositors allowed us to assess the ovipositor 3D shape variation  
218 precisely. We found a significant effect of temperature and geographic variation on the ovipositor  
219 size and 3D shape, but the effects appeared weak and all nine experimental groups were not fully  
220 discriminated (Table 1). Although the interaction between geographic and temperature factors was

221 significant in the multivariate model, no differences among shape trajectories or allometric slopes in  
222 response to temperature were detected among geographic populations (Figure 2).

### 223 **Measurement error**

224 The repeated reconstruction of the 3D shape of the two individuals from Sapporo raised at 16°C  
225 showed that the variation in the reconstruction process was almost four times smaller than variation  
226 between individuals ( $MS_{IND}/MS_{RES} = 3.92$ ,  $p = 0.011$ ). Although substantial, measurement error due to  
227 3D reconstruction and landmarking processes should not preclude detection of genuine variation  
228 among individual ovipositors.

### 229 **Temperature and population effects**

230 Overall, both temperature ( $Z = 5.27$ ,  $p < 0.001$ ) and geography ( $Z = 4.72$ ,  $p < 0.001$ ) had a significant  
231 effect on ovipositor shape. In addition, temperature interacted with geography in their association  
232 with shape ( $Z = 1.95$ ,  $p = 0.026$ ), suggesting a different effect of temperature among geographic  
233 populations. The pairwise comparisons between geographic samples showed that the significance of  
234 this interaction was driven by a subtle difference between Sapporo and Paris populations ( $Z = 1.96$ ,  $p$   
235  $= 0.035$ ).

236 The temperature shift from 22° to 16°C is associated with a narrowed ovipositor overall  
237 (Figure 3). At 16° the ovipositor seemed to be elongated and flatter, producing an inner folding of the  
238 lateral parts of the ovipositor within the structure and therefore smaller and plane lateral parts. The  
239 increase from 22° to 28°C produced again an overall narrowing of the ovipositor (although less  
240 pronounced than at 16°) and the widening of the anterior part of the ovipositor. In comparison to  
241 Sapporo population, Paris population showed a narrower posterior part and more folding on the  
242 lateral parts, which were smaller. Dayton seemed the most elongated geographic population and the  
243 one with the narrowest anterior part.

244 The trajectory analysis showed a striking conservation of the shape variation patterns among  
245 geographic populations (Figure 2). Trajectories for all geographic populations showed very similar  
246 path lengths (Paris = 0.10, Sapporo = 0.08, Dayton = 0.10) and no difference was detected (Sapporo-  
247 Paris: effect size = -0.02,  $p = 0.41$ , Sapporo-Dayton: effect size = -0.48,  $p = 0.63$ , Paris-Dayton: effect  
248 size = -1.05,  $p = 0.87$ ). Although angles among populations showed larger variation, no difference  
249 among trajectory angles was found (Sapporo-Paris: angle = 120.56°, Effect size = 0.98,  $p = 0.977$ ,  
250 Sapporo-Dayton: angle = 100.36°, Effect size = 0.48,  $p = 0.361$ , Dayton-Paris: angle = 41.92°, Effect  
251 size = -0.96,  $p = 0.77$ ). Similarly, shape differences among trajectories were no significant (Sapporo-  
252 Paris: Procrustes distance = 0.10, effect size = -1.16,  $p = 0.89$ , Sapporo-Dayton: Procrustes distance =



253 0.25, effect size = -0.04,  $p = 0.47$ , Paris-Dayton: Procrustes distance = 0.17, effect size = -0.70,  $p =$   
254 0.74).

## 255 **Size variation and allometry**

256 The ovipositor size was found to decrease with increasing temperature (Figure 5,  $F_{2, 130} = 92.31$ ,  $p <$   
257  $0.001$ ). Geography also showed a significant effect on the ovipositor size (Figure 5,  $F_{2, 130} = 14.875$ ,  $p <$   
258  $0.001$ ), Dayton populations being larger than Paris. No interaction between temperature and  
259 population effects was detected ( $F_{4, 130} = 2.138$ ,  $p = 0.08$ ), suggesting that the plasticity of ovipositor  
260 size was conserved across populations.

261 Ovipositor shape and size were correlated, so the plastic response to temperature produced  
262 a general allometric pattern ( $Z = 3.79$ ,  $p < 0.001$ ). When the allometric slope among geographic  
263 populations was compared, no significant difference was found ( $Z = 0.49$ ,  $p = 0.325$ ). Because size  
264 variation is primarily affected by temperature, the shape variation associated to size variation was  
265 very similar to that associated to temperature.

## 266 **Comparison with the wing**

267 Wing shape showed much larger Mahalanobis distances among temperatures than the ovipositor  
268 shape, suggesting that wing shape is more plastic than ovipositor shape. For the ovipositor, the  
269 distances from 22°C to the extreme temperatures are relatively stable: 2.38 to 16°C and 3.03 to 28°C.  
270 For the wing, both distances were larger but the high temperature had a stronger impact on shape:  
271 2.87 to 16°C and 5.60 to 28°C. When we look at the distances between the extreme temperatures  
272 the difference between structures became more evident: we obtained a measure of 3.74 from 16° to  
273 28°C for the ovipositor and a measure of 7.78 for the wing.

274 For the centroid size, within temperature CV were close to 3% for both the wing and the  
275 ovipositor (Wing:  $CV_{16^{\circ}\text{C}} = 3.07\%$ ,  $CV_{22^{\circ}\text{C}} = 3.86\%$ ,  $CV_{28^{\circ}\text{C}} = 2.19\%$ ; Ovipositor:  $CV_{16^{\circ}\text{C}} = 3.67\%$ ,  $CV_{22^{\circ}\text{C}} =$   
276  $3.86\%$ ,  $CV_{28^{\circ}\text{C}} = 3.67\%$ ). The wing showed a much larger plastic response among temperatures ( $CV =$   
277  $14.28\%$ ) than the ovipositor ( $CV = 4.55\%$ ).

278

## 279 **DISCUSSION**

280 Our results showed significant but limited plasticity of the ovipositor shape to developmental  
281 temperature in comparison to the wing, suggesting a high robustness of the former structure against  
282 environmental variation. We also found some geographic variation associated to the ovipositor  
283 shape but its effect seemed subtle as well. This variation probably arises as a consequence of the

284 geographic spread of this species over the last years (Fraitout et al., 2017). Although the interaction  
285 between temperature and geographic variation appeared significant, we did not find differences  
286 among reaction norms in either trajectory size, direction or shape. The allometry test confirmed  
287 these results from a different perspective: developmental temperature produces a particular  
288 relationship between the ovipositor size and shape that appeared stable among geographic  
289 populations.

290 Developmental temperature is a well-known factor in the origin of size and shape variation in  
291 insects (Atkinson, 1994; Ray, 1960). In the ovipositor we found the expected effect of developmental  
292 temperature (i. e. higher temperature, smaller ovipositors) (David et al., 1997) and the expected  
293 presence of allometry published for 2D analyses (Clemente et al., 2018). Our 3D approach allowed us  
294 to depict and quantify the full shape of the ovipositor and should thus allow detecting any  
295 differences among temperature and geographic factors.

296 In the light of our estimates, and especially if we compare the effect of temperature on the  
297 ovipositor size with that on in wing size in the same populations under the same experimental design  
298 (Fraitout et al., 2018), the ovipositor appears to be somewhat robust to temperature. The mild  
299 plastic variation expressed in our experiments and the success of the invasion suggest that the  
300 ovipositor is able to perform well in a wide range of environmental conditions. The ovipositor might  
301 thus be submitted to stabilizing selection, limiting its range of variation. This limited plasticity is  
302 congruent with the limited geographic variation detected, expected for a trait under stabilizing  
303 selection (Ovaskainen et al., 2011). A formal  $Q_{st}/F_{st}$  comparison would nevertheless be necessary to  
304 test this hypothesis. This robustness is consistent with previous studies of phenotypic plasticity in  
305 *Drosophila*, showing a reduced variability of genitalia compared to other body parts (Shingleton et  
306 al., 2009; Shingleton et al., 2018). From an evolutionary point of view, such a robustness might be  
307 expected for a sexual structure, likely under a high selective pressure (e. g. Frazee and Masly, 2015).  
308 This evolutionary conservatism associated to reproductive performance is coherent with recent  
309 evidence about the coevolution of the ovipositor with the male genitalia (Muto et al., 2018) and  
310 general hypotheses about the role of female genitalia in avoiding reproductive interference  
311 (Eberhard, 2009; Eberhard et al., 1998).

312 Albeit limited, some plasticity in the ovipositor was nevertheless detected, that might have  
313 consequences on the female ability to pierce the fruits tegument. Temperature enhances fruit  
314 ripening and this change in the fruit consistency (weakening the surface) might impose new  
315 functional demands on the ovipositor morphology to successfully perforate the fruits during the  
316 oviposition (Figure 6). Although fully hypothetical, it is conceivable that the plastic shape changes

317 reported here might have some adaptive value. This should be tested experimentally by evaluating  
318 the relative performance on a variety of substrates, of the cold and hot-generated ovipositors. Other  
319 factors like the existence of alternative selective pressures imposed on the ovipositor morphology  
320 such as sexual coevolution (Muto et al., 2018) and pleiotropic genetic effects during the ovipositor  
321 development (Green et al., 2018) might limit to such morphological adaptation.

322 The lack of difference in plasticity between invasive and native populations suggests that the  
323 role of plasticity in the ovipositor during the worldwide invasion of *D. sukukii*, if any, has been limited.  
324 A similar result was found for wing shape plasticity, using males from the same populations  
325 (Framout et al., 2018). It has been proposed that plasticity might be transient during colonization  
326 (Lande, 2015), leaving open the possibility that plasticity might have contributed to the invasion  
327 success prior being genetically fixed. Given the speed of *D. sukukii* invasion (Framout et al., 2017)  
328 and the fact that all three populations show limited plastic responses, such hypothesis of ‘rapidly-  
329 evolving’ plasticity nevertheless seems unlikely.

330 In conclusion, while we detected some genetic divergence among populations and some  
331 thermal plasticity, phenotypic variation of the ovipositor was very limited, suggesting a high  
332 phenotypic robustness indicative of a history of stabilizing selection. The lack of difference in  
333 plasticity among populations suggests that the ovipositor large performance spectrum and  
334 phenotypic robustness rather than its plasticity would contribute to *D. sukukii* invasive success.

335

### 336 **Acknowledgements**

337 We would like to thank K. Tamura, M. Toda, P. Shearer, S. Fellous and T. Schlenke for their help  
338 during the fly sampling. We also thank M. Guillaume for her help with the fly stock maintenance and  
339 F. Peronnet for the rearing medium we used. ESEM imaging was performed at the Plateform MEA,  
340 University of Montpellier. S. Gerber helped with the interpretation of some of the methods. This  
341 article was also improved by the comments made during the SWING project meetings and the  
342 different people attending the seminars where it was presented, as the GDR PlasPhen 2018 in Lyon.

343

### 344 **Competing interests**

345 The authors declare no competing or financial interests.

346

347

348 **Author contributions**

349 Conceptualization: AF, VD and RC. Flies collection: AF and VD. Experimentation and microscopy data  
350 collection: AF. Photogrammetric data collection: CVG and AD. Morphometric analysis: CVG. Results,  
351 discussion and writing: CVG, VD and RC.

352

353 **Funding**

354 This study was funded by the Agence Nationale de la Recherche (ANR) under the project SWING  
355 (ANR-16-CE02-0015).

356

357 **References**

358 **Adams, D. C., Collyer, M. L. and Kaliontzopoulou, A.** (2018). Geomorph: Software for geometric  
359 morphometric analyses. *R package version 3.0.6*.

360 **Agisoft, L.** (2014). *Agisoft PhotoScan user manual: professional edition*.

361 **Asplen, M. K., Anfora, G., Biondi, A., Choi, D.-S., Chu, D., Daane, K. M., Gibert, P., Gutierrez, A. P.,**  
362 **Hoelmer, K. A., Hutchison, W. D., et al.** (2015). Invasion biology of spotted wing *Drosophila*  
363 (*Drosophila suzukii*): a global perspective and future priorities. *Journal of Pest Science* **88**,  
364 469–494.

365 **Atallah, J., Teixeira, L., Salazar, R., Zaragoza, G. and Kopp, A.** (2014). The making of a pest: the  
366 evolution of a fruit-penetrating ovipositor in *Drosophila suzukii* and related species.  
367 *Proceedings of the Royal Society B* **281**, 20132840.

368 **Atkinson, D.** (1994). Temperature and organism size - a biological law for ectotherms. *Advances in*  
369 *Ecological Research* **25**, 1–58.

370 **Botton-Divet, L., Houssaye, A., Herrel, A., Fabre, A.-C. and Cornette, R.** (2015). Tools for quantitative  
371 form description; an evaluation of different software packages for semi-landmark analysis.  
372 *PeerJ* **3**, e1417.

373 **Bourne, M. C.** (1982). Effect of Temperature on Firmness of Raw Fruits and Vegetables. *Journal of*  
374 *Food Science* **47**, 440–444.

375 **Bradshaw, A. D.** (1965). Evolutionary significance of phenotypic plasticity in plants. *Advances in*  
376 *Genetics* **13**, 115–155.

377 **Buser, T. J., Sidlauskas, B. L. and Summers, A. P.** (2018). 2D or Not 2D? Testing the Utility of 2D Vs.  
378 3D Landmark Data in Geometric Morphometrics of the Sculpin Subfamily Oligocottinae  
379 (Pisces; Cottoidea). *The Anatomical Record* **301**, 806–818.

- 380 **Cardini, A.** (2014). Missing the third dimension in geometric morphometrics: how to assess if 2D  
381 images really are a good proxy for 3D structures? *Hystrix, the Italian Journal of Mammalogy*  
382 **25**, 73–81.
- 383 **Chevin, L.-M., Lande, R. and Mace, G. M.** (2010). Adaptation, Plasticity, and Extinction in a Changing  
384 Environment: Towards a Predictive Theory. *PLOS Biology* **8**, e1000357.
- 385 **Cignoni, P., Callieri, M., Corsini, M., Dellepiane, M., Ganovelli, F. and Ranzuglia, G.** (2008). Meshlab:  
386 an open-source mesh processing tool. In *Eurographics Italian chapter conference*, pp. 129–  
387 136.
- 388 **Clemente, M., Fusco, G., Tonina, L. and Giomi, F.** (2018). Temperature-induced phenotypic plasticity  
389 in the ovipositor of the invasive species *Drosophila suzukii*. *Journal of Thermal Biology* **75**,  
390 62–68.
- 391 **Collyer, M. L. and Adams, D. C.** (2013). Phenotypic trajectory analysis: comparison of shape change  
392 patterns in evolution and ecology. *Hystrix* **24**, 75.
- 393 **Collyer, M., Sekora, D. and Adams, D.** (2015). A method for analysis of phenotypic change for  
394 phenotypes described by high-dimensional data. *Heredity* **115**, 357.
- 395 **Crill, W. D., Huey, R. B. and Gilchrist, G. W.** (1996). Within-and between-generation effects of  
396 temperature on the morphology and physiology of *Drosophila melanogaster*. *Evolution* **50**,  
397 1205–1218.
- 398 **David, J. R., Gibert, P., Gravot, E., Petavy, G., Morin, J.-P., Karan, D. and Moreteau, B.** (1997).  
399 Phenotypic plasticity and developmental temperature in *Drosophila*: Analysis and  
400 significance of reaction norms of morphometrical traits. *Journal of Thermal Biology* **22**, 441–  
401 451.
- 402 **Davidson, A. M., Jennions, M. and Nicotra, A. B.** (2011). Do invasive species show higher phenotypic  
403 plasticity than native species and, if so, is it adaptive? A meta-analysis. *Ecology Letters* **14**,  
404 419–431.
- 405 **Eberhard, W. G.** (2009). STATIC ALLOMETRY AND ANIMAL GENITALIA. *Evolution* **63**, 48–66.
- 406 **Eberhard, W. G., Huber, B. A., S., R. L. R., Briceño, R. D., Salas, I. and Rodriguez, V.** (1998). ONE SIZE  
407 FITS ALL? RELATIONSHIPS BETWEEN THE SIZE AND DEGREE OF VARIATION IN GENITALIA AND  
408 OTHER BODY PARTS IN TWENTY SPECIES OF INSECTS AND SPIDERS. *Evolution* **52**, 415–431.
- 409 **Farnsworth, D., Hamby, K. A., Bolda, M., Goodhue, R. E., Williams, J. C. and Zalom, F. G.** (2017).  
410 Economic analysis of revenue losses and control costs associated with the spotted wing  
411 drosophila, *Drosophila suzukii* (Matsumura), in the California raspberry industry. *Pest*  
412 *Management Science* **73**, 1083–1090.
- 413 **Fraimout, A., Debat, V., Fellous, S., Hufbauer, R. A., Foucaud, J., Pudlo, P., Marin, J.-M., Price, D. K.,  
414 Cattel, J., Chen, X., et al.** (2017). Deciphering the Routes of invasion of *Drosophila suzukii* by  
415 Means of ABC Random Forest. *Molecular Biology and Evolution* **34**, 980–996.
- 416 **Fraimout, A., Jacquemart, P., Villarroel, B., Aponte, D. J., Decamps, T., Herrel, A., Cornette, R. and  
417 Debat, V.** (2018). Phenotypic plasticity of *Drosophila suzukii* wing to developmental  
418 temperature: implications for flight. *Journal of Experimental Biology* **221**, jeb166868.

- 419 **Frazeo, S. R. and Masly, J. P.** (2015). Multiple sexual selection pressures drive the rapid evolution of  
420 complex morphology in a male secondary genital structure. *Ecology and Evolution* **5**, 4437–  
421 4450.
- 422 **Green, J. E., Cavey, M., Caturegli, E., Gompel, N. and Prud'homme, B.** (2018). Evolution of ovipositor  
423 length in *Drosophila suzukii* is driven by enhanced cell size expansion and anisotropic tissue  
424 reorganization. *bioRxiv* 466375.
- 425 **Gunz, P. and Mitteroecker, P.** (2013). Semilandmarks: a method for quantifying curves and surfaces.  
426 *Hystrix, the Italian Journal of Mammalogy* **24**, 103–109.
- 427 **Gunz, P., Mitteroecker, P. and Bookstein, F. L.** (2005). Semilandmarks in three dimensions. In  
428 *Modern morphometrics in physical anthropology*, pp. 73–98. Springer.
- 429 **Hoffmann, A. and Parsons, P.** (1988). The analysis of quantitative variation in natural populations  
430 with isofemale strains. *Genetique, selection, evolution* **20**, 87.
- 431 **Khazaei, J. and Mann, D. D.** (2004). Effects of temperature and loading characteristics on mechanical  
432 and stress relaxation properties of sea buckthorn berries. Part 2. Puncture Tests. *Agricultural*  
433 *Engineering International: CIGR Journal*.
- 434 **Klingenberg, C. P. and Monteiro, L. R.** (2005). Distances and Directions in Multidimensional Shape  
435 Spaces: Implications for Morphometric Applications. *Systematic Biology* **54**, 678–688.
- 436 **Lande, R.** (2015). Evolution of phenotypic plasticity in colonizing species. *Molecular Ecology* **24**,  
437 2038–2045.
- 438 **Lee, C. E. and Gelembiuk, G. W.** (2008). Evolutionary origins of invasive populations. *Evolutionary*  
439 *Applications* **1**, 427–448.
- 440 **Loh, R., David, J. R., Debat, V. and Bitner-Mathé, B. C.** (2008). Adaptation to different climates  
441 results in divergent phenotypic plasticity of wing size and shape in an invasive drosophilid.  
442 *Journal of Genetics* **87**, 209.
- 443 **Mazzi, D., Bravin, E., Meraner, M., Finger, R. and Kuske, S.** (2017). Economic Impact of the  
444 Introduction and Establishment of *Drosophila suzukii* on Sweet Cherry Production in  
445 Switzerland. *Insects* **8**,.
- 446 **Mitteroecker, P. and Bookstein, F.** (2011). Linear discrimination, ordination, and the visualization of  
447 selection gradients in modern morphometrics. *Evolutionary Biology* **38**, 100–114.
- 448 **Monteiro, L. R.** (1999). Multivariate regression models and geometric morphometrics: the search for  
449 causal factors in the analysis of shape. *Systematic Biology* **48**, 192–199.
- 450 **Muto, L., Kamimura, Y., Tanaka, K. M. and Takahashi, A.** (2018). An innovative ovipositor for niche  
451 exploitation impacts genital coevolution between sexes in a fruit-damaging *Drosophila*. *Proc.*  
452 *R. Soc. B* **285**, 20181635.
- 453 **Nijhout, H. F. and German, R. Z.** (2012). Developmental Causes of Allometry: New Models and  
454 Implications for Phenotypic Plasticity and Evolution. *Integrative and Comparative Biology* **52**,  
455 43–52.



- 456 **Nijhout, H. F., Riddiford, L. M., Mirth, C., Shingleton, A. W., Suzuki, Y. and Callier, V.** (2014). The  
457 developmental control of size in insects. *Wiley Interdisciplinary Reviews: Developmental*  
458 *Biology* **3**, 113–134.
- 459 **Ovaskainen, O., Karhunen, M., Zheng, C., Arias, J. M. C. and Merilä, J.** (2011). A New Method to  
460 Uncover Signatures of Divergent and Stabilizing Selection in Quantitative Traits. *Genetics* **189**,  
461 621.
- 462 **Poyet, M., Le Roux, V., Gibert, P., Meirland, A., Prévost, G., Eslin, P. and Chabrerie, O.** (2015). The  
463 Wide Potential Trophic Niche of the Asiatic Fruit Fly *Drosophila suzukii*: The Key of Its  
464 Invasion Success in Temperate Europe? *PLOS ONE* **10**, e0142785.
- 465 **Rasband, W. S.** (2012). ImageJ: Image processing and analysis in Java. *Astrophysics Source Code*  
466 *Library*.
- 467 **Ray, C.** (1960). The application of Bergmann's and Allen's rules to the poikilotherms. *Journal of*  
468 *Morphology* **106**, 85–108.
- 469 **Richards, C. L., Bossdorf, O., Muth, N. Z., Gurevitch, J. and Pigliucci, M.** (2006). Jack of all trades,  
470 master of some? On the role of phenotypic plasticity in plant invasions. *Ecology Letters* **9**,  
471 981–993.
- 472 **RStudio Team** (2016). *RStudio: Integrated development for R*. Boston, MA: RStudio, Inc.
- 473 **Schlager, S.** (2017). Morpho and Rvcg-Shape analysis in R: R-Packages for geometric morphometrics,  
474 shape analysis and surface manipulations. In *Statistical shape and deformation analysis*, pp.  
475 217–256.
- 476 **Shearer, P. W., West, J. D., Walton, V. M., Brown, P. H., Svetec, N. and Chiu, J. C.** (2016). Seasonal  
477 cues induce phenotypic plasticity of *Drosophila suzukii* to enhance winter survival. *BMC*  
478 *ecology* **16**, 11.
- 479 **Shingleton, A. W., Estep, C. M., Driscoll, M. V. and Dworkin, I.** (2009). Many ways to be small:  
480 different environmental regulators of size generate distinct scaling relationships in  
481 *Drosophila melanogaster*. *Proc. R. Soc. B* **276**, 2625–2633.
- 482 **Shingleton, A. W., McDonald, J. M., Ghosh, S. M. and Gascoigne, S. J.** (2018). Plasticity through  
483 canalization: The contrasting effect of temperature on trait size and growth in *Drosophila*.  
484 *Frontiers in Cell and Developmental Biology* **6**, 156.
- 485 **Via, S. and Lande, R.** (1985). GENOTYPE-ENVIRONMENT INTERACTION AND THE EVOLUTION OF  
486 PHENOTYPIC PLASTICITY. *Evolution* **39**, 505–522.
- 487 **West-Eberhard, M. J.** (1989). Developmental plasticity and the origins of diversity. *Annual Review in*  
488 *Ecology and Systematics* **20**, 249–278.
- 489 **Wiley, D. F., Amenta, N., Alcantara, D. A., Ghosh, D., Kil, Y. J., Delson, E., Harcourt-Smith, W., John,**  
490 **K. S., Rohlf, F. J. and Hamann, B.** (2005). Evolutionary morphing.
- 491 **Yeh, P. J. and Price, T. D.** (2004). Adaptive Phenotypic Plasticity and the Successful Colonization of a  
492 Novel Environment. *The American Naturalist* **164**, 531–542.

493

494 **Tables**

495

|             | Paris 16° | Paris 22° | Paris 28° | Sapporo 16° | Sapporo 22° | Sapporo 28° | Dayton 16° | Dayton 22° |
|-------------|-----------|-----------|-----------|-------------|-------------|-------------|------------|------------|
| Paris 22°   | 0.0058    |           |           |             |             |             |            |            |
| Paris 28°   | 0.0082    | 0.0104    |           |             |             |             |            |            |
| Sapporo 16° | 0.1224    | 0.0034    | 0.0004    |             |             |             |            |            |
| Sapporo 22° | 0.0002    | 0.0063    | 0.0001    | 0.0036      |             |             |            |            |
| Sapporo 28° | 0.0107    | 0.0001    | 0.0055    | 0.0550      | 0.0053      |             |            |            |
| Dayton 16°  | 0.0306    | 0.0115    | 0.0001    | 0.0415      | 0.0002      | 0.0002      |            |            |
| Dayton 22°  | 0.0107    | 0.3861    | 0.0010    | 0.0790      | 0.0208      | 0.0007      | 0.2093     |            |
| Dayton 28°  | 0.0460    | 0.0044    | 0.0060    | 0.1402      | 0.0193      | 0.2199      | 0.0136     | 0.0254     |

496

497 **Table 1. Discriminant analysis for temperature and geographic factors.** 1000 permutations using  
 498 Procrustes distances between group means were run with the function *groupPCA* of the R package  
 499 Morpho. No significant results are shaded.

500

501

502

503

504

505

506

507



508 **Figures**

509

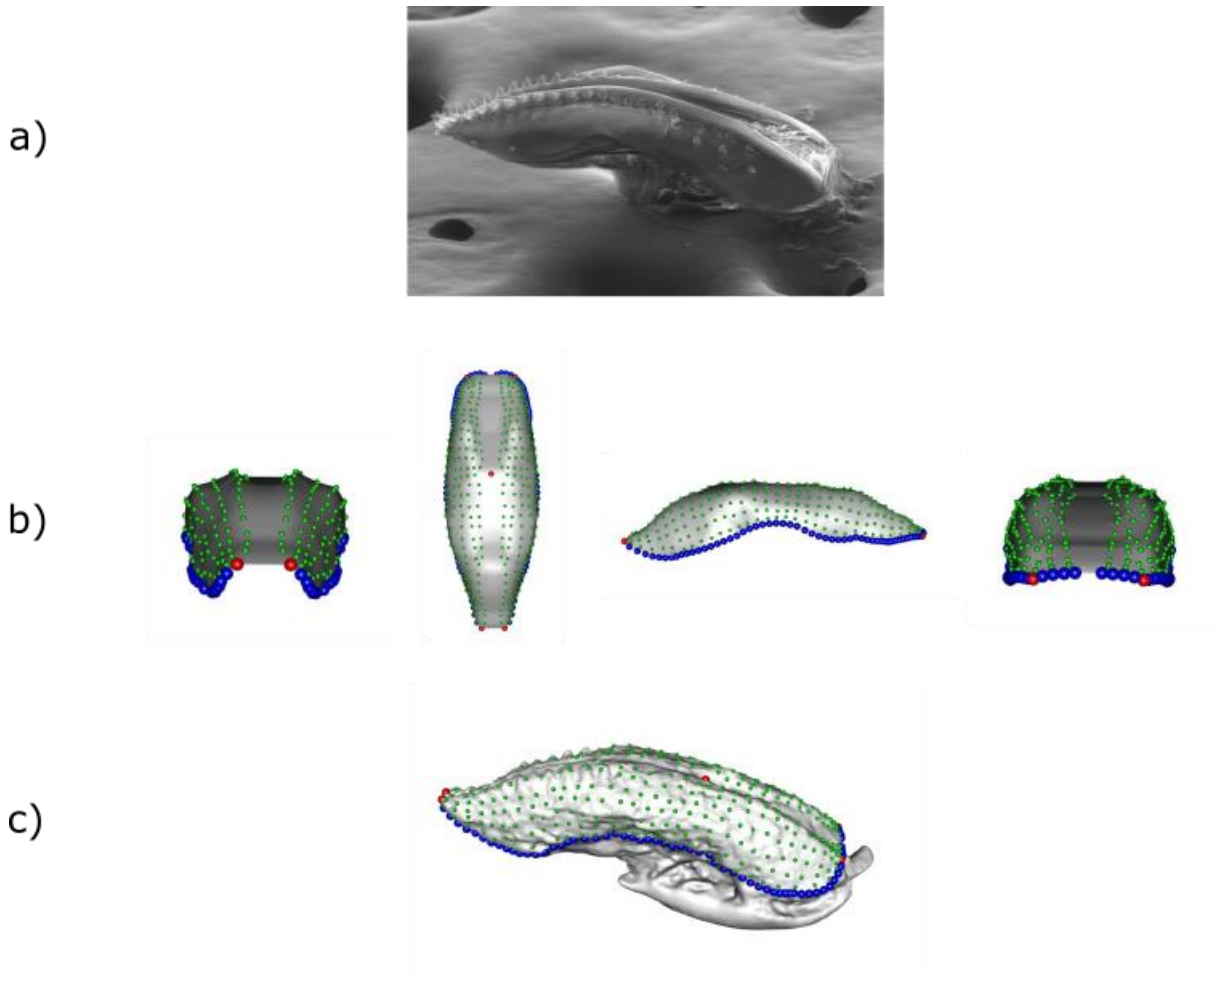

510

511 **Figure 1. Ovipositor at electronic microscopy (a), template (b) and ovipositor phenotyping (c).** Once  
512 the ovipositor pictures at electronic microscopy were obtained (a) and the 3D reconstruction of the  
513 ovipositor was done, we build a template with a simplified shape of an ovipositor (b) where we  
514 placed landmarks (red), semilandmarks (blue) and surface semilandmarks (green). This template was  
515 then projected to each 3D reconstruction to obtain the 3D landmarks characterizing the ovipositor  
516 shape (c).

517

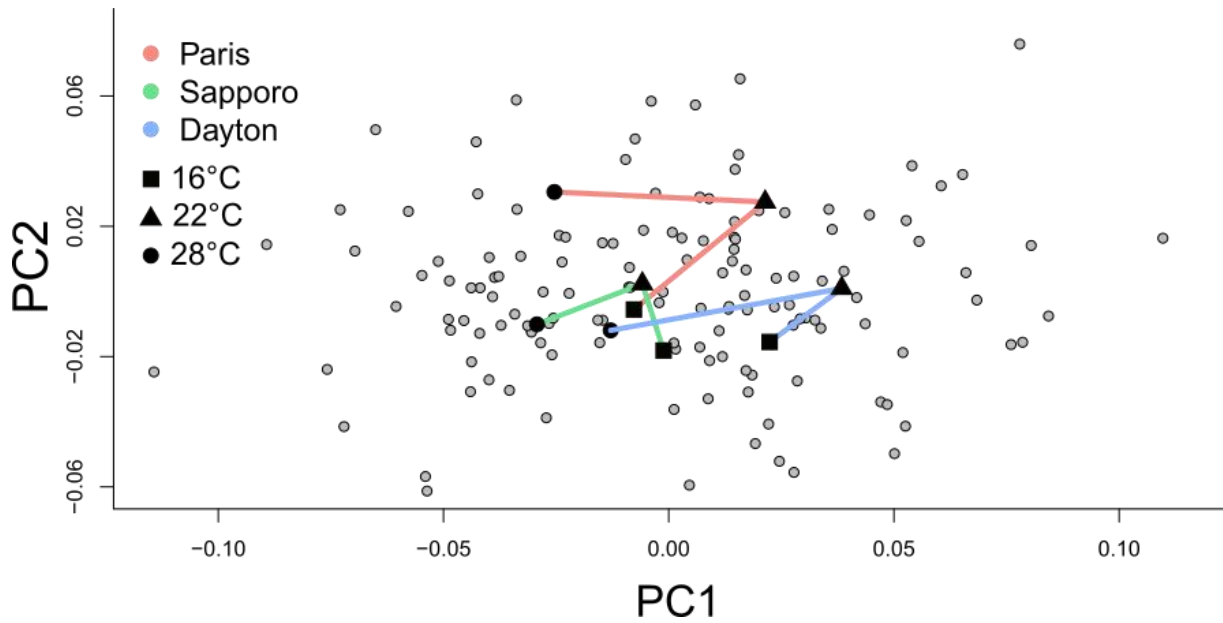

518

519 **Figure 2. Ovipositor 3D shape variability and plasticity trajectories in response to developmental**  
520 **temperature.** First two principal components of the ovipositor shape for individuals (gray) and  
521 temperature means for each geographic population (black; square: 16°C, triangle: 22°C, circle: 28°C).  
522 The three temperature levels for each geographic population are joined so the reaction norms can be  
523 visualized for each population (Paris: red, Sapporo: green, Dayton: blue). We can observe the overlap  
524 among reaction norms and the similarity in their trajectories, suggesting similar plasticities among  
525 populations.

526

527

528

### Shape changes in response to temperature

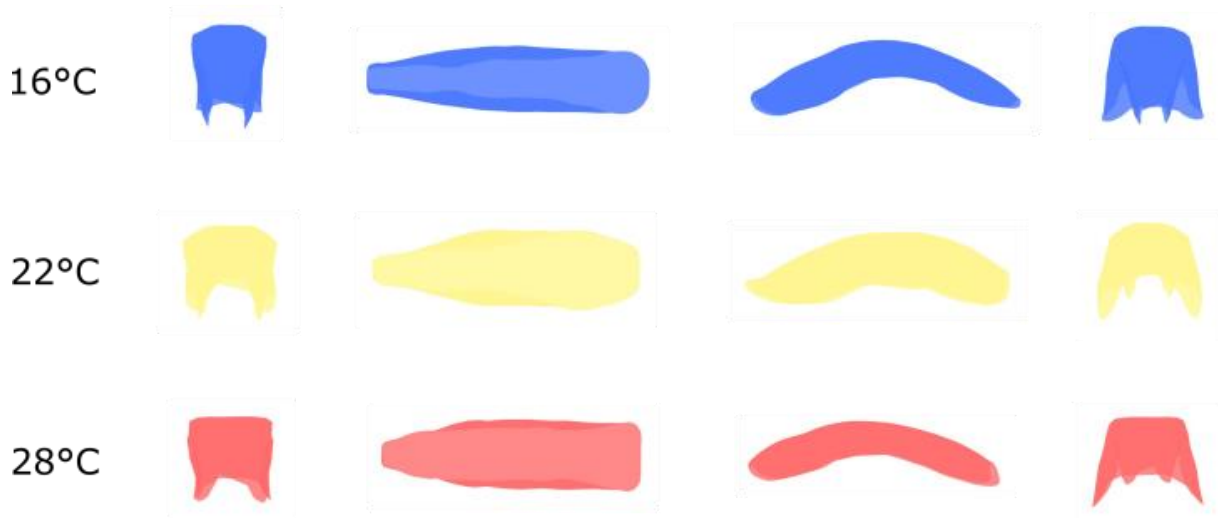

529

530 **Figure 3. Effect of developmental temperature on the ovipositor 3D shape.** While the ovipositor  
531 shape at 22°C (center row) represents the approximate real shape of the three populations at that  
532 temperature, morphologies at extreme temperatures are represented as exaggerated versions (five  
533 standard deviations) of the linear transformation from 22°C to each temperature. Therefore, the  
534 linear transformation from 16° to 28°, not biologically meaningful as the effect of temperature is not  
535 linear, is not represented. 3D shapes are captured by four different perspectives (from left to right:  
536 posterior, dorsal, lateral and anterior). Shape changes were obtained with the Morpho library. See  
537 results for the description of the shape changes.

538

539

## Shape changes associated to geographic variation

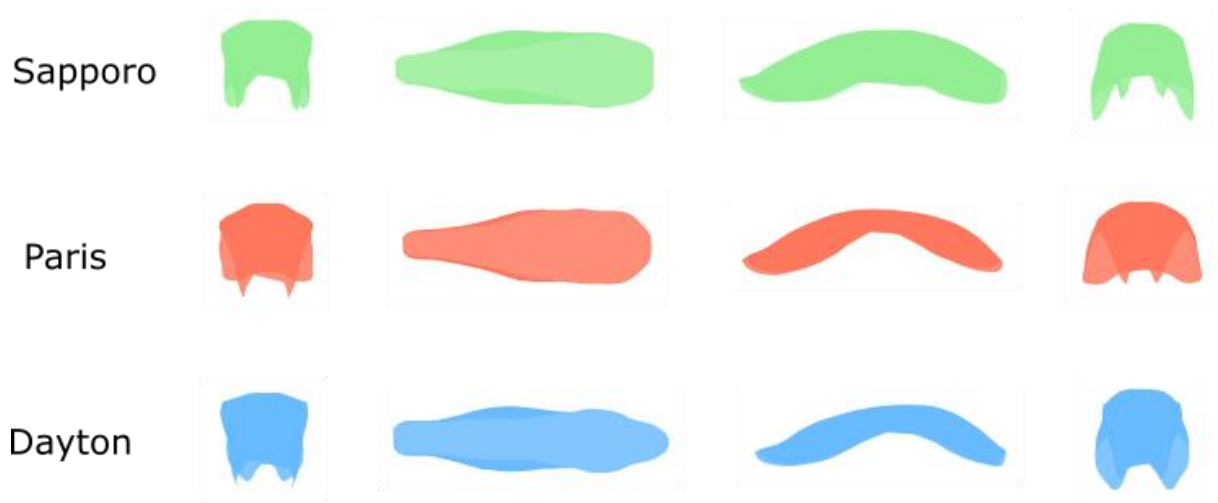

540

541 **Figure 4. Effect of developmental temperature on the ovipositor 3D shape.** Here we represent the  
542 exaggerated linear deformation (three standard deviations) from the overall mean shape to each  
543 geographic population shape. 3D shapes are captured by four different perspectives (from left to  
544 right: distal, dorsal, lateral and proximal). Similarly to Figure 3, the lineal transformation from the  
545 Paris to Dayton population does not make biological sense since both come from a Japanese  
546 population (Framout et al., 2017). Therefore, Sapporo population is represented by its true mean  
547 shape and the other two population as a linear transformation from the former to each of the latter  
548 populations. Shape changes were obtained with the Morpho library. See results for the description of  
549 the shape changes.

550

551

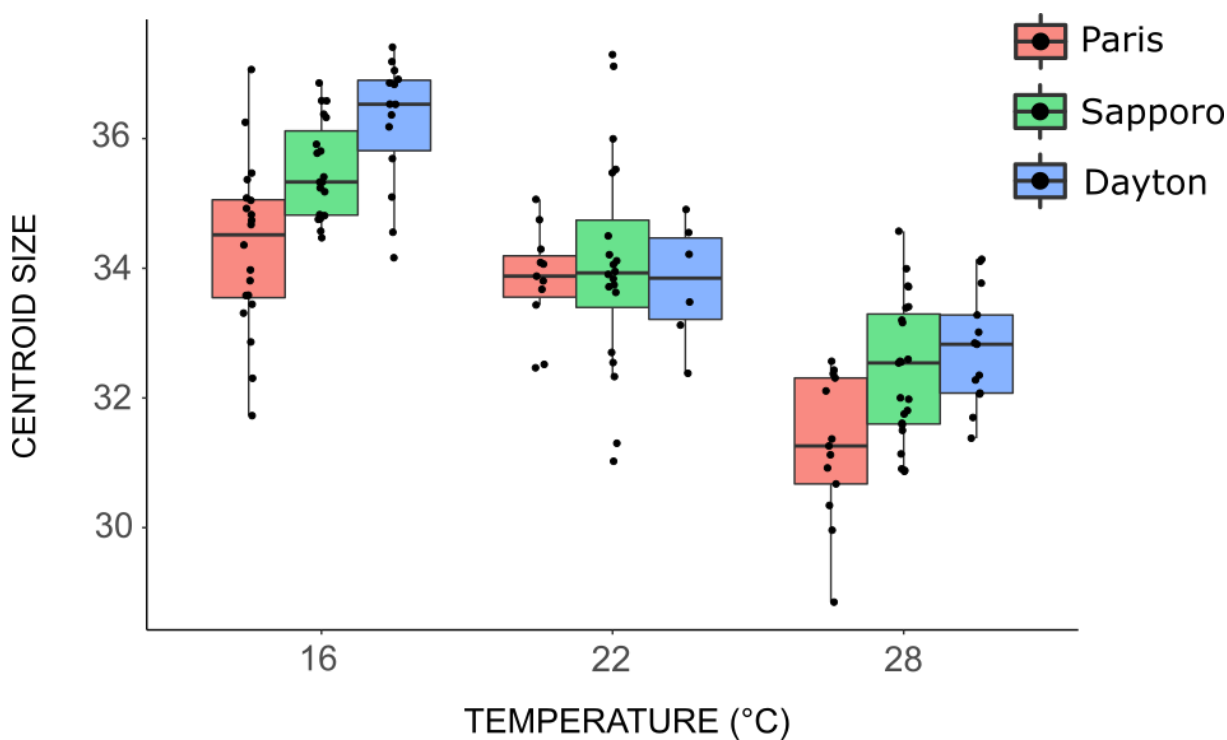

552

553 **Figure 5. Effect of developmental temperature on the ovipositor centroid size.** Ovipositor centroid  
554 size variation in response to developmental temperature (16°C: left block, 22°C: middle block, 28°C:  
555 right block), for each population (Paris: red, Sapporo: green, Dayton: blue).

556

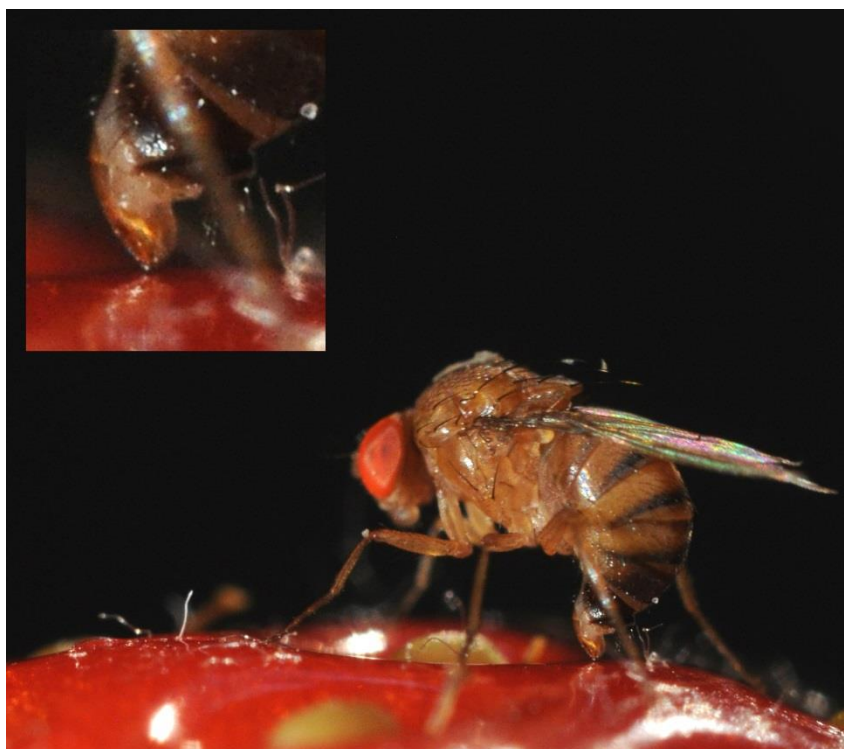

557

558 **Figure 6. *Drosophila suzukii* ovipositing on a strawberry.**
